# Supplementary material for: Genome-Wide Gene Expression Profiling of Fertilization Competent Mycelium in Opposite Mating Types in the Heterothallic Fungus Podospora anserina
Source: PLoS One. 2011 Jun 28;6(6):e21476. doi: 10.1371/journal.pone.0021476 (PMC3125171; doi:10.1371/journal.pone.0021476)
Supplement: Table S6 — RT-qPCR validation of microarray. Cq values for mating-type target gene and reference gene cDNAs are reported for mat+ and mat− strains in 96 h-old mycelium. (XLS) [file pone.0021476.s006.xls]

## Sheet: Feuil1
Table S6. RT-qPCR validation of microarray. Cq values for mating-type target gene and reference gene cDNAs are reported for mat+ and mat- strains in 96 h-old mycelium
	UBC Pa_4_7790	GPD Pa_3_5110	AS1 Pa_1_16650	PDF2 Pa_7_6690	MFM Pa_1_8290	PRE1 Pa_7_9070	protease Pa_6_7350	Glc_trans Pa_5_2930	P450 Pa_5_6620	MFP Pa_2_2310	3858 Pa_4_3858	SAM Pa_1_24410	PRE2 Pa_4_1380	PAG Pa_5_9770	AOX Pa_3_1710	PEPCK Pa_4_3160	lipase Pa_2_5340	methyl transferase4 Pa_4_80	methyl transferase1 Pa_4_80
mat- biological replicate 1	16.2	15.85	16.63	19.1	11.61	20.72	22.74	22	22.77	25.18	29.22	26.84	23.88	37.12	23.31	21.96	20.89	24.35	25.72
mat- biological replicate 2	15.72	15.61	16.29	18.64	11.85	20.09	22.63	21.52	22.14	19.44	28.31	26.32	23.43	34.15	23.5	22.03	21.38	23.94	25.16
mat- biological replicate 3	16	15.71	16.53	18.84	11.34	19.71	22.41	22.05	22.94	21.15	28.68	26.57	23.67	35.06	23.55	21.92	21.32	23.41	24.62
mat- biological replicate 4	15.84	15.61	16.55	18.85	11.49	19.73	22.56	22.45	23.26	26.63	28.56	26.63	23.69	36.22	24.03	21.86	20.88	24.39	25.55
mat- biological replicate 5	16.21	15.91	16.67	19.2	11.6	20.13	22.85	21.89	22.74	27.26	29.23	26.83	23.89	35.78	23.79	21.8	21.12	23.99	25.14
mat+ biological replicate 1	15.86	15.73	16.58	18.84	25.65	27.93	24.98	21.78	22.94	9.79	24.08	19.52	17.6	26.58	22.46	21.47	20.91	21.78	22.95
mat+ biological replicate 2	16.1	15.76	16.56	18.76	22.8	27.8	25.2	22.05	23.12	9.93	23.24	19.54	17.07	25.82	22.77	21.71	21.08	21.55	22.66
mat+ biological replicate 3	16.07	15.87	16.55	18.73	27.18	28.16	24.88	21.97	22.9	9.86	23.43	19.16	17.13	25.85	22.84	21.54	20.5	21.44	22.62
mat+ biological replicate 4	18.02	17.86	18.36	20.71	27.72	29.67	26.52	23.82	25.04	11.64	25.9	20.89	18.99	28.39	23.91	23.53	23.09	23.33	24.83
mat+ biological replicate 5	15.91	15.58	16.46	18.87	24.33	28.5	25.5	21.66	22.62	10.61	23.71	19.8	17.17	26.8	22.62	21.43	20.58	21.55	22.66
