# Supplementary material for: Genome-Wide Gene Expression Profiling of Fertilization Competent Mycelium in Opposite Mating Types in the Heterothallic Fungus Podospora anserina
Source: PLoS One. 2011 Jun 28;6(6):e21476. doi: 10.1371/journal.pone.0021476 (PMC3125171; doi:10.1371/journal.pone.0021476)
Supplement: Table S12 — Orthologous pairs in P. anserina FMR1 and S. macrospora SMTA-1 target genes. (XLS) [file pone.0021476.s012.xls]

## Sheet: Feuil1
clone number	accession number for P. anserina orthologs	Gene name or function	P. anserina gene differentially expressed in mat+ vs fpr1-	FC_mat- vs fmr1-	p-value_mat- vs fmr1-	S. macrospora log2(DSmtA-1 / wt)
NCU01521	Pa_4_8380	ThiJ/PfpI family protein	0	1.32	0.09899
NCU05135	Pa_4_2219	cell surface protein	0	-1.26	0.00571
NCU00830	Pa_1_16400	high affinity copper transporter	1	-1.5	0	-2.97341
NCU01943	Pa_5_10110	putative protein of unknown function	0	-1.18	0.68032
NCU06110	Pa_5_8470	thiazole biosynthetic enzyme	1	1.67	0.00027	-2.88794
NCU04606	Pa_2_680	pre-mRNA-splicing factor	0	1.14	0.00128
NCU00829	Pa_1_16410	ferric reductase	1	-1.67	0	-2.79101
NCU01213	Pa_5_1740	superoxide dismutase	0	-1.05	0.36668
NCU04283		no ortholog detected in P. anserina
NCU04552	Pa_5_3270	cytosolic 40S ribosomal protein Rps26	0	1.06	0.38047
NCU07894	Pa_2_7670	oligopeptide transporter	0	1.04	0.75863
NCU05088		not found in databases
NCU06048	Pa_1_19780	40S ribosomal protein S30	0	1.23	1e-05
NCU03407	Pa_6_4050	rho GTPase Rho4	0	-1.16	0.02107
NCU03039	Pa_1_17810	splicing factor u2af large subunit	0	1.02	0.62878
NCU04553	Pa_5_3280	ubiquitin	0	1.13	0.00165
NCU01348	Pa_2_1200	agmatinase	1	2.16	0	-2.45076
NCU07503	Pa_1_8760	putative protein of unknown function	0	-1.34	0.00068
NCU02880	Pa_1_1320	putative protein of unknown function	0	-1.22	0.00099
NCU05667	Pa_7_470	putative protein of unknown function	0	1.12	0.23645
NCU02884	Pa_1_1270	putative protein of unknown function	1	-4.49	0	-2.33104
NCU02490	Pa_1_6240	DnaJ domain-containing protein	0	1.04	0.47941
NCU07014	Pa_1_23210	40S ribosomal protein S17	0	1.14	0.08739
NCU05561	Pa_4_3517	metallothionein encoded by the PaMt1	0	1.12	0.25582
NCU06068	Pa_5_4070	fungal specific transcription factor	0	1	0.95404
NCU02919	Pa_4_5690	cupin domain-containing protein	0	-1.09	0.01383
NCU05996	Pa_4_7770	C6 finger domain-containing protein	0	-1.11	0.07547
NCU01528	Pa_3_5110	glyceraldehyde-3-phosphate dehydrogenase	0	1.24	0.00031
NCU00726	Pa_1_4920	peptidyl-prolyl cis-trans isomerase	0	1.02	0.6104
NCU01212	Pa_2_4470	putative protein of unknown function	1	-4.58	0	-2.22155
5.8S_forward		no corresponding feature on P. anserina microarray
NCU06506	Pa_7_8020	putative protein of unknown function	0	1.54	0.19467
NCU09434	Pa_5_8910	eukaryotic translation initiation factor 2C	0	-1.15	0.05405
NCU08133	Pa_4_9090	carbonic anhydrase	1	-1.66	0	-2.14905
NCU02602		no ortholog detected in P. anserina
NCU07926	Pa_3_1260	glutaminyl-tRNA synthetase	0	-1.02	0.64772
NCU03370	Pa_3_6160	protein similar to protein CAP20 of Colletotrichum gloeosporioides	0	-1.03	0.74452
NCU02901		no ortholog detected in P. anserina
NCU09109	Pa_1_9590	60S ribosomal protein L33-A	0	1.17	0.00013
NCU01065	Pa_2_8400	ammonium transporter MEP2	0	-1.22	0.02561
NCU01272	Pa_2_2660	mitochondrial presequence protease	0	1.12	0.01115
NCU05274	Pa_3_4460	eukaryotic translation initiation factor 5A	0	1.15	0.0014
NCU09477	Pa_3_10150	ADP,ATP carrier protein	0	1.03	0.57946
NCU07817	Pa_7_11490	IgE-binding protein	0	1.46	0
NCU03412		no ortholog detected in P. anserina
NCU00979	Pa_1_16600	60S acidic ribosomal protein P2	0	1.21	0.00047
NCU07277	Pa_2_1570	Glycoside Hydrolase Family 16	0	1.48	0
NCU07309	Pa_1_23320	guanine deaminase	0	-1.34	0.00026
NCU03558	Pa_6_4720	mitochondrial ATP synthase epsilon chain	0	1.05	0.38419
NCU01882	Pa_1_21180	purine transporter	0	-1.03	0.70311
NCU09476	Pa_3_10140	40S ribosomal protein S25	0	1.14	0.00313
NCU05498	Pa_4_3430	putative protein of unknown function	0	-1.12	0.06913
NCU05780	Pa_1_5100	glutathione S-transferase	1	1.89	0.00128	-2.02424
NCU06643	Pa_2_1990	oleate-induced peroxisomal protein	0	-1.29	0.16648
NCU08627	Pa_1_130	40S ribosomal protein S21	0	-1.08	0.89568
NCU00217	Pa_7_2600	binuclear zinc transcription factor	0	-1.11	0.40134
NCU09929	Pa_1_22870	putative protein of unknown function	0	-1.13	0.0246
NCU07857	Pa_7_11280	60S ribosomal protein L34	0	1.09	0.01658
NCU09119	Pa_1_9450	ATP synthase subunit gamma	0	-1.01	0.91357
NCU03635	Pa_2_9290	60S ribosomal protein L38	0	1.22	0.0001
NCU03365	Pa_3_6010	box C/D snoRNA accumulation	0	1.11	0.52872
NCU06525	Pa_0_90	putative protein of unknown function	0	1.38	0.03064
NCU08383		no ortholog detected in P. anserina
NCU07917	Pa_6_7850	putative protein of unknown function	1	-1.9	0	-1.9725
NCU00634	Pa_1_14350	cytosolic 60S ribosomal protein L14	0	1.09	0.11457
NCU01452	Pa_2_5310	cytosolic 40S ribosomal protein S3a	0	1.04	0.47047
NCU02200	Pa_5_9800	phosphatidylinositol transfer protein SFH5	0	-1.16	0.00045
NCU08693	Pa_6_2570	heat shock protein 70	0	-1.07	0.13052
NCU00475	Pa_7_6810	cytosolic 40S ribosomal protein S18	0	-1.17	0.78
100h1_210		no ortholog detected in P. anserina
NCU01271	Pa_2_2650	ornithine decarboxylase	0	-1.01	0.90693
NCU04720	Pa_4_6800	nitrite reductase [NAD(P)H]	1	1.93	0.00135	-1.92755
NCU03302	Pa_2_2360	cytosolic 60S ribosomal protein L36	0	1.22	3e-05
NCU01825		no ortholog detected in P. anserina
NCU09089	Pa_1_19780	cytosolic 40S ribosomal protein S30	0	1.23	1e-05
NCU05753	Pa_4_1350	ESCRT-I component	0	1.33	0.00097
NCU06556	Pa_6_8740	thioredoxin PaTrx2	0	1.11	0.15947
NCU05758	Pa_4_1380	pheromone receptor PRE2	0	1.17	0.38903
NCU02830	Pa_1_7850	ARF GTPase activator	0	-1.48	0.02904
NCU05048		no ortholog detected in P. anserina
NCU07776	Pa_7_130	anchored cell wall protein-5	0	-1	0.97481
NCU00464	Pa_7_5490	60S ribosomal protein L32	0	1.07	0.0892
NCU09768		no ortholog detected in P. anserina
NCU09152	Pa_5_925	not found in databases
NCU04451		no ortholog detected in P. anserina
NCU09851		no ortholog detected in P. anserina
NCU04050	Pa_4_7660	cross-pathway control protein 1	0	1.17	0.00234
NCU02921		no ortholog detected in P. anserina
NCU07562	Pa_7_7225	60S ribosomal protein L43	0	1.25	0
NCU03813	Pa_2_11630	formate dehydrogenase	1	1.71	0	-1.86645
NCU03565	Pa_6_4330	60S ribosomal protein L26	0	1.09	0.07057
NCU01452	Pa_2_5310	cytosolic 40S ribosomal protein S3a	0	1.04	0.47047
NCU01552	Pa_3_5360	cytosolic 40S ribosomal protein S23	0	1.22	1e-05
NCU00315	Pa_7_5790	cytosolic 60S ribosomal protein L29	0	1.16	0.00116
NCU06740	Pa_3_8980	putative protein of unknown function	0	1.14	0.0077
NCU02509	Pa_1_8360	cytosolic 60S ribosomal protein L11	0	1.1	0.06099
NCU10970		no ortholog detected in P. anserina
NCU02260	Pa_5_9250	26S protease regulatory subunit 6B	0	-1.03	0.54656
NCU04899	Pa_3_2600	malate dehydrogenase	0	1.06	0.13456
NCU04637	Pa_2_420	reduced viability upon starvation protein 167	0	-1.34	0.02166
NCU07909	Pa_6_10570	hydrolase	0	-1.13	0.0088
NCU05816	Pa_4_755	cytochrome c oxidase subunit VIIa	0	1.03	0.53154
NCU04870	Pa_3_830	acetyl xylan esterase	1	1.51	0.00455	-1.83614
NCU07040		no ortholog detected in P. anserina
NCU05789	Pa_4_870	beta-glucanase	1	-2.25	0	-1.83181
NCU05569	Pa_4_4160	putative protein of unknown function	1	-1.93	0	-1.82856
NCU00618	Pa_1_14790	cytosolic 40S ribosomal protein S27	0	1.14	0.02636
NCU01798	Pa_3_8580	putative protein of unknown function	0	-1.05	0.89071
NCU02834	Pa_1_8050	vacuolar membrane protein	0	-1.24	0.00047
NCU00775	Pa_1_5850	isocitrate dehydrogenase	0	-1.06	0.18443
NCU00673	Pa_1_12990	serine proteinase	0	-1.01	0.8598
NCU05231	Pa_1_24210	ER membrane DUF1077 domain-containing protein	0	1.01	0.89915
NCU02127	Pa_1_20110	methylcrotonoyl-CoA carboxylase beta chain	0	-1.42	0
NCU01695	Pa_3_6790	RNA binding protein Nrd1	1	-2.26	9e-05	-1.8141
NCU06702	Pa_2_5730	protein yop-1	0	-1.13	0.00084
NCU02003	Pa_1_19720	elongation factor 1-alpha	0	1.16	0.00656
NCU02184	Pa_1_19950	chitinase	0	-1.05	0.85077
NCU04856	Pa_1_18080	glutamine synthetase	0	-1.01	0.94144
NCU05631		no ortholog detected in P. anserina
NCU08093	Pa_6_10810	F0-ATPase subunit J	0	1.16	8e-05
NCU08960	Pa_2_13080	cytosolic 60S acidic ribosomal protein P1	0	1.1	0.01963
NCU08468	Pa_3_9560	actin-interacting protein	0	-1.24	0.00705
NCU03530		no ortholog detected in P. anserina
NCU08992		no ortholog detected in P. anserina
NCU00294	Pa_7_6070	60S ribosomal protein L10a	0	1.04	0.43457
NCU07222	Pa_3_2830	putative protein of unknown function	0	1.04	0.43457
NCU10498	Pa_1_13430	cytosolic 60S ribosomal protein L35	0	1.09	0.02612
NCU08500	Pa_3_7750	cytosolic 40S ribosomal protein S8	0	1.13	0.00763
NCU05551	Pa_4_3560	putative protein of unknown function	0	-1.16	0.14647
NCU00819		no ortholog detected in P. anserina
NCU04202	Pa_2_9020	nucleoside diphosphate kinase	0	1.18	0.00034
NCU01607	Pa_6_5060	putative protein of unknown function	0	1.08	0.70053
NCU05801	Pa_1_23360	putative protein of unknown function	0	1.17	0.60075
NCU09002	Pa_7_7670	NADH-ubiquinone oxidoreductase B12 subunit	0	1.08	0.1731
NCU08965	Pa_2_13200	putative protein of unknown function	0	1.1	0.00262
NCU02253		no ortholog detected in P. anserina
NCU08397	Pa_2_7670	oligopeptide transporter	0	1.04	0.75863
NCU03102	Pa_1_11720	cytosolic 40S ribosomal protein S11	0	1.1	0.07688
NCU03703	Pa_2_12110	cytosolic 60S ribosomal protein L17	0	1.14	0.00892
NCU01221	Pa_2_4670	cytosolic 60S ribosomal protein L16	0	1.09	0.06558
NCU04318		no ortholog detected in P. anserina
NCU09442	Pa_5_11650	DUF757 domain-containing protein	0	1.13	0.0027
xnc030_190		no ortholog detected in P. anserina
NCU05120	Pa_4_1700	DNA-directed RNA polymerase	0	-1.04	0.30341
NCU02047		not found in databases
NCU04138	Pa_2_3790	50S ribosomal protein L36	0	-1.01	0.90181
NCU00250	Pa_7_4610	putative protein of unknown function	0	-1.77	0.26699
NCU05306	Pa_3_3920	putative protein of unknown function	1	-1.66	0	-1.74767
NCU06047	Pa_5_5040	cytosolic 40S ribosomal protein S2	0	-1.02	0.81833
NCU03748	Pa_2_3550	saccharopine dehydrogenase	0	-1.13	0.05545
NCU01219	Pa_1_16690	glutaredoxin	0	-1.1	0.10435
NCU07496	Pa_1_6940	SET domain-containing protein	1	-1.69	0.00045	-1.73837
NCU03150	Pa_1_14490	cytosolic 60S ribosomal protein L24	0	1.08	0.02876
NCU06226	Pa_7_8820	cytosolic 60S ribosomal protein L25	0	1.17	0.00662
NCU00951	Pa_1_7830	inorganic pyrophosphatase	0	-1.17	0.01333
NCU06550	Pa_6_8360	pyridoxine biosynthesis protein	0	-1.17	0.01333
NCU00758	Pa_1_6050	formate/nitrite transporter	0	1.33	0.41161
NCU03148	Pa_1_14470	nascent polypeptide-associated complex subunit beta	0	1.03	0.40901
NCU00935	Pa_1_2010	immunogenic protein	0	-1.3	0.04826
68b2_110	Pa_2_3640	SAP domain protein	0	-1.34	2e-05
NCU01754	Pa_3_7460	alcohol dehydrogenase	1	2.37	0	-1.71619
NCU00357	Pa_7_5170	mitochondrial outer membrane protein	0	1.02	0.84317
NCU01204	Pa_2_6110	tropomyosin-2	0	-1.16	0.00026
NCU07998	Pa_6_1245	DNA polymerase delta subunit Cdc27	0	1.2	0.00128
NCU06844	Pa_3_7260	putative protein of unknown function	1	-1.6	2e-05	-1.71043
NCU07531	Pa_7_4720	cation transport ATPase	0	-1.11	0.08348
NCU08091		no ortholog detected in P. anserina
NCU02262		no ortholog detected in P. anserina
NCU03772		no ortholog detected in P. anserina
NCU07830	Pa_7_11530	cytosolic 40S ribosomal protein S14	0	1.15	0.00017
NCU03340	Pa_3_6130	cytochrome-c oxidase chain VIIc	0	1.11	0.02028
NCU00692	Pa_1_18900	chaperone dnaK	0	1.03	0.49613
NCU01082	Pa_2_7740	putative protein of unknown function	0	1.11	0.26942
NCU00433		not found in databases
NCU08964	Pa_2_13190	cytosolic 60S ribosomal protein L10	0	1.24	1e-05
NCU07241	Pa_6_6730	putative protein of unknown function	0	1.33	9e-05
NCU01962	Pa_1_20570	cytochrome c oxidase polypeptide VIa	0	1.11	0.00148
NCU07107		no ortholog detected in P. anserina
NCU10042	Pa_1_10540	enolase	0	-1.04	0.36259
NCU03372	Pa_3_6260	non-specific lipid-transfer protein	0	-1.38	1e-05
NCU08888	Pa_2_6560	phenylalanyl-tRNA synthetase	0	1.04	0.24758
NCU00971	Pa_1_16650	cytosolic 40S ribosomal protein S15	0	1.2	0.00553
NCU07680	Pa_6_3590	LysM domain protein	0	-1.07	0.3051
NCU01645	Pa_3_6910	WW domain protein	0	-1.49	0.00773
NCU05554	Pa_4_3590	cytosolic 60S ribosomal protein L13	0	-1.09	0.0983
NCU03806	Pa_2_11690	cytosolic 60S ribosomal protein L27a	0	1.1	0.04988
NCU05381	Pa_3_9840	putative protein of unknown function	0	1.02	0.7165
xnc072_030		no ortholog detected in P. anserina
NCU08963	Pa_2_13180	cytosolic 60S ribosomal protein L30	0	1.1	0.01244
NCU01827	Pa_3_8450	cytosolic 60S ribosomal protein L27	0	1.14	0.00935
NCU05142		no ortholog detected in P. anserina
NCU05714	Pa_7_350	mitochondrial LSU ribosomal protein L10	0	-1.13	0.05103
NCU01317	Pa_2_2510	cytosolic 60S ribosomal protein L12	0	1.09	0.05997
NCU07826	Pa_7_11570	cytosolic 40S ribosomal protein S19	0	1.21	0.00019
NCU03023	Pa_1_7750	phenol 2-monooxygenase	0	1.01	0.91485
NCU01458		no ortholog detected in P. anserina
NCU00263	Pa_7_4520	serin endopeptidase	0	1.01	0.95086
NCU00676	Pa_1_13030	ATP12	0	-1.01	0.85921
NCU02107	Pa_1_2690	acyl-CoA synthetase	0	-1.23	0.00086
NCU02909	Pa_1_530	chitosanase	0	-1.01	0.96018
NCU07182	Pa_2_13870	cytosolic 40S ribosomal protein S24	0	1.14	0.00791
NCU07445	Pa_1_19240	putative protein of unknown function	0	1.27	0.00016
NCU07550	Pa_7_7820	triosephosphate isomerase	0	1.03	0.48672
NCU07163	Pa_2_14020	putative protein of unknown function	0	-1.05	0.76534
NCU03288	Pa_4_980	putative protein of unknown function	0	1.23	0.19609
NCU05390	Pa_6_5140	mitochondrial phosphate carrier protein	0	-1.08	0.27088
NCU05804	Pa_4_650	cytosolic 60S ribosomal protein L19	1	-2.39	0	-1.63058
NCU00006	pa_7_6020	SH3 domain protein	0	-1.27	4e-05
NCU06892	Pa_0_1580	cytosolic 40S ribosomal protein S20	0	1.18	0.0026
NCU07787	Pa_2_4030	protein similar to SnodProt1 of Phaeosphaeria nodorum	1	1.5	0	-1.62782
NCU01966	Pa_1_20530	cytosolic 60S ribosomal protein L37	0	1.15	6e-05
NCU07225	Pa_1_1010	xylanase	1	-1.52	9e-05	-1.62731
NCU09057	Pa_5_11930	LEA domain-containing protein	0	-1.23	0.49185
NCU05991	Pa_4_8110	3-keto-steroid reductase	1	-1.66	0	-1.62209
NCU01809	Pa_3_8790	AAA ATPase	0	1.15	0.00785
NCU02784	Pa_1_3520	putative protein of unknown function	0	-1	0.96711
NCU01210	Pa_2_5620	para-aminobenzoate synthase	0	-1.11	0.79587
NCU04140	Pa_2_3770	FK506-binding protein	0	-1.13	0.6161
NCU00745		no ortholog detected in P. anserina
NCU08438	Pa_2_4130	anchored cell wall protein-5	0	1	0.9851
NCU09718	Pa_5_680	N(4)-(beta-N-acetylglucosaminyl)-L-asparaginase	0	-1.08	0.67225
NCU06185	Pa_7_1970	cell wall surface anchor signal protein	0	1.03	0.6104
NCU09184	Pa_7_760	indoleamine 2,3-dioxygenase family protein	0	-1.17	0.00932
NCU09680	Pa_0_1250	exoglucanase-6A	0	-1.03	0.87588
NCU05779		no ortholog detected in P. anserina
NCU08268	Pa_6_6130	TapA protein	0	-1.04	0.82822
NCU08525	Pa_6_6500	putative protein of unknown function	0	-1.07	0.54176
NCU04966		not found in databases
NCU09934		not found in databases
NCU03038	Pa_1_17820	cytosolic 40S ribosomal protein S13	0	1.2	4e-05
NCU02136	Pa_1_17420	transaldolase	0	1.04	0.40015
NCU03826	Pa_2_12200	elongation factor 1-gamma	0	1.03	0.66748
NCU07430	Pa_1_19280	MADS box protein	0	-1.1	0.06149
NCU09475	Pa_3_10130	cytosolic 40S ribosomal protein S5	0	1.11	0.03057
NCU07938	Pa_3_1760	MFS transporter	0	-1.01	0.91485
NCU00706	Pa_1_4760	cytosolic 60S ribosomal protein L44	0	-1.04	0.47688
NCU05594	Pa_4_9770	L-galactose dehydrogenase	0	1.13	0.03443
NCU05390	Pa_6_5140	mitochondrial precursor of phosphate carrier protein	0	-1.08	0.27088
NCU06432	Pa_7_10160	cytosolic 40S ribosomal protein S12	0	1.12	0.02506
NCU09643	Pa_3_520	phosphatidate cytidylyltransferase	0	-1.1	0.08137
NCU06006	Pa_4_7620	serine/threonine-protein kinase	0	-1.23	0.07757
NCU04779	Pa_4_9080	cytosolic 60S ribosomal protein L7a	0	1.09	0.06831
NCU01541		no ortholog detected in P. anserina
NCU06261	Pa_7_6520	uracil phosphoribosyltransferase	0	1.26	0.00275
NCU04511	Pa_6_7110	ChAPs family protein	0	-1.09	0.05642
NCU05045	Pa_5_7050	monocarboxylate transporter	1	1.86	0	-1.57354
NCU02771	Pa_1_7570	uroporphyrinogen decarboxylase	0	1.09	0.01591
NCU05220	Pa_1_24160	mitochondrial F1F0 ATP synthase subunit F Atp17	0	1.11	0.02212
NCU08212		no ortholog detected in P. anserina
NCU02090	Pa_1_3400	adenine phosphoribosyltransferase	0	-1.26	9e-05
NCU03155	Pa_1_14530	UPF0041 domain-containing protein	0	1.05	0.18667
NCU01615	Pa_6_5410	putative protein of unknown function	1	-1.59	0.00118	-1.56663
NCU02954	Pa_1_6340	homoisocitrate dehydrogenase	0	1.04	0.51374
NCU00644	Pa_1_2480	mitochondrial F1F0-ATP synthase g subunit	0	1.03	0.79108
NCU08916		no ortholog detected in P. anserina
NCU09468	Pa_3_10220	tubulin alpha-B chain	0	-1.01	0.86751
NCU07027	Pa_1_23940	glycogen phosphorylase	0	1.15	0.01568
NCU10653		not found in databases
NCU09599	Pa_6_3840	putative protein of unknown function	0	1.04	0.4135
NCU03233	Pa_1_2190	ubiquinol-cytochrome-c reductase complex subunit 9	0	1.07	0.12133
NCU02818		no ortholog detected in P. anserina
NCU06132		no ortholog detected in P. anserina
NCU01248	Pa_2_3210	telomere end-binding protein Pot1	0	-1.09	0.10983
NCU05574	Pa_4_3730	acetyltransferase	0	-1.24	0.00267
NCU04980		not found in databases
NCU05852		no ortholog detected in P. anserina
NCU03731	Pa_2_9410	HAD superfamily hydrolase	0	-1.5	0.11521
NCU06478	Pa_5_1060	SAM dependent methyltransferase	0	-1.14	0.00188
NCU05296	Pa_3_4350	spindle pole body component alp4	0	-1.04	0.38265
NCU09217	Pa_1_10690	Golgi reassembly-stacking protein 1	0	-1.04	0.62249
NCU07954	Pa_3_1700	eukaryotic translation initiation factor 3 subunit EifCj	0	1.03	0.47523
NCU08859	Pa_0_1050	protein phosphatase regulatory subunit Glc9	0	-1.09	0.51842
NCU01948	Pa_1_20680	cytosolic 60S ribosomal protein L21	0	1.1	0.08512
NCU05545	Pa_4_3240	leucine-rich repeat protein	0	-1.3	0.01188
NCU09510	Pa_7_1520	N-acetylglucosaminyl-phosphatidylinositol de-N-acetylase	0	1.06	0.23251
NCU09008	Pa_7_7280	UPF0617 protein c	0	-1.11	0.74755
NCU01635	Pa_6_5350	histone H3	0	1.05	0.25497
NCU06661	Pa_2_2490	cytosolic 60S ribosomal protein L22	0	1.16	0.007
NCU07375	Pa_1_17920	MFS phosphate transporter	1	2.02	3e-05	-1.53057
NCU02095	Pa_1_3440	putative protein of unknown function	0	1.04	0.77346
NCU03199	Pa_1_9080	ATP synthase subunit H	0	-1	0.96248
NCU07564	Pa_7_6950	siderophore iron transporter	1	-1.67	0	-1.52739
NCU04901		no ortholog detected in P. anserina
NCU02744	Pa_1_13540	cytosolic 60S ribosomal protein L9	0	1.12	0.02363
NCU08512	Pa_5_5910	heat shock transcription factor	0	-1.22	0.03386
NCU02463	Pa_1_22240	bax Inhibitor	0	-1.03	0.50643
NCU08518	Pa_3_7140	ibosomal biogenesis protein Gar2	0	1.32	0
NCU09331	Pa_1_12470	L-PSP endoribonuclease	0	1	0.9928
NCU08504		no ortholog detected in P. anserina
NCU03773		no ortholog detected in P. anserina
NCU01142	Pa_2_7140	NADH-ubiquinone oxidoreductase subunit	0	1.07	0.36855
NCU02130	Pa_1_20130	putative protein of unknown function	0	-1.09	0.42592
NCU04304	Pa_2_9780	outer mitochondrial membrane protein porin	0	-1.05	0.31687
NCU03988	Pa_4_2390	cytosolic 60S ribosomal protein L18	0	1.03	0.59343
NCU02472	Pa_1_22280	NADH-ubiquinone oxidoreductase 20.8 kDa subunit	0	1.08	0.0284
NCU01442	Pa_2_5440	DUF1671 domain-containing protein	0	-1.25	0.00012
NCU06464	Pa_7_10110	translationally-controlled tumor protein	0	1.13	0.00471
NCU07972	Pa_3_1570	putative protein of unknown function	0	1.01	0.90141
NCU05420	Pa_3_9770	chorismate synthase	0	1.09	0.06376
NCU08523	Pa_7_4150	putative protein of unknown function	0	-1.26	0.1937
NCU07408	Pa_1_10320	cytosolic 60S ribosomal protein P0	0	1.06	0.13961
NCU07371		no ortholog detected in P. anserina
NCU07434	Pa_1_19400	short-chain dehydrogenase/reductase SDR	1	1.57	0.00105	-1.49999
NCU00066	Pa_7_9220	pre-mRNA-splicing factor cwc-22	0	1.01	0.85393
NCU02807	Pa_1_7895	mitochondrial ATPase inhibitor	0	-1.04	0.35466
NCU03241	Pa_1_3000	FKBP-type peptidyl-prolyl cis-trans isomerase	0	1.18	0.00094
NCU02193	Pa_5_520	pyruvate decarboxylase	0	1.4	0.00031
NCU07112	Pa_3_10800	sulfide:quinone oxidoreductase	0	-1	0.95701
NCU01776	Pa_3_9090	cytosolic 60S ribosomal protein L15	0	1.06	0.28907
NCU08565		no ortholog detected in P. anserina
NCU07131		no ortholog detected in P. anserina
NCU06431	Pa_7_10170	cytosolic 40S ribosomal protein S22	0	1.15	0.00498
NCU05224	Pa_1_24190	uridine/cytidine kinase	0	-1.07	0.4512
NCU08421	Pa_3_10610	U3 snoRNP-associated protein Utp5	0	1.23	3e-05
NCU05247		not found in databases
NCU04395		no ortholog detected in P. anserina
NCU08344	Pa_1_3970	cytosolic 60S ribosomal protein L31	0	1.14	0.02579
NCU05672		no ortholog detected in P. anserina
NCU05995	Pa_4_7790	ubiquitin	0	1	0.96896
NCU05774		no ortholog detected in P. anserina
NCU02797	Pa_1_7480	UTP--glucose-1-phosphate uridylyltransferase	0	-1.15	0.00066
NCU09470	Pa_3_10085	putative protein of unknown function	0	1.31	0.00085
NCU08878	Pa_2_6190	septum-promoting GTP-binding protein 1	0	-1.07	0.58147
NCU09495	Pa_5_450	set-domain histone methyltransferase-6	0	-1.44	0.20637
NCU10776	Pa_5_9590	flap endonuclease	0	-1.04	0.60472
NCU00399		no ortholog detected in P. anserina
NCU08333		no ortholog detected in P. anserina
NCU08340	Pa_1_4530	ADP-ribosylation factor	0	-1	0.99487
NCU06529		no ortholog detected in P. anserina
NCU04726	Pa_4_8720	beta-hexosaminidase	0	-1.33	0.00172
NCU00905	Pa_1_1810	N-acylethanolamine amidohydrolase	0	-1.05	0.33397
NCU04160		no ortholog detected in P. anserina
NCU09774	Pa_5_10670	ferulic acid esterase A	0	1.06	0.75582
NCU06588	Pa_6_760	F0-ATPase subunit K	0	1.1	0.06413
NCU02948	Pa_1_6390	NADH-quinone oxidoreductase	0	1.06	0.50114
NCU03121	Pa_1_11010	putative protein of unknown function	0	-1.13	0.39903
NCU09909	Pa_6_10950	urea active transporter	0	-1.03	0.88198
NCU08510	Pa_3_7600	tRNA-splicing endonuclease subunit	0	-1.28	0.29304
NCU06741	Pa_3_8970	cytochrome c oxidase polypeptide VIb	0	1.05	0.3557
NCU08712	Pa_3_11110	putative protein of unknown function	0	1.05	0.7031
NCU03910	Pa_4_8820	cytochrome b5	0	-1.02	0.72786
NCU06349	Pa_1_22680	putative protein of unknown function	0	-1.02	0.65916
NCU08146	Pa_5_3840	putative protein of unknown function	0	1.08	0.28148
NCU01084	Pa_2_7760	cytosolic Fe-S cluster assembling factor CFD1	0	1.18	0.02305
NCU01341	Pa_2_1245	U1 small nuclear ribonucleoprotein C	0	1.05	0.47947
NCU05599	Pa_4_9720	cytosolic 40S ribosomal protein S28	0	1.25	1e-05
NCU06198	Pa_7_2320	GDP-mannose transporter	0	-1.25	8e-05
NCU08990	Pa_7_7430	cytosolic 60S ribosomal protein L39	0	1.1	0.09516
NCU00489	Pa_7_6710	cytosolic 40S ribosomal protein S3	0	1.06	0.40705
NCU07044	Pa_1_23510	metallo-beta-lactamase domain-containing protein	0	1.46	0.34881
NCU02604	Pa_1_2550	WD repeat protein	0	1.4	0
NCU00625		not found in databases
NCU03738	Pa_2_12000	cytosolic 40S ribosomal protein S29	0	1.1	0.05177
2nc610_190		no ortholog detected in P. anserina
NCU09372	Pa_6_8825	putative protein of unknown function	0	-1.85	0.01599
NCU01914	Pa_1_20970	sorting nexin-3	0	-1.01	0.93055
NCU09659	Pa_6_11250	5'-nucleotidase	0	1.13	0.01227
NCU07273	Pa_6_9200	putative protein of unknown function	0	1.04	0.63455
NCU06905	Pa_5_11880	tetrahydroxynaphthalene reductase	1	-1.51	6e-05	-1.43586
NCU01610		no ortholog detected in P. anserina
NCU04570	Pa_2_480	NIMA interactive protein	0	-1.06	0.79314
NCU05479		no ortholog detected in P. anserina
NCU01548	Pa_3_5290	Cytosolic inhibitor of vacuolar proteinase B	0	-1	0.95179
NCU02415	Pa_5_5880	zinc metalloproteinase	1	-1.51	2e-05	-1.43093
1nc580_360		no ortholog detected in P. anserina
NCU02984	Pa_1_18740	translation machinery-associated protein 22	0	-1.02	0.61667
NCU04135	Pa_2_3820	putative protein of unknown function	0	1.08	0.36477
NCU05430	Pa_6_5610	ATP synthase subunit beta	0	1.08	0.0843
NCU05552	Pa_4_3570	putative protein of unknown function	0	1.15	0.00104
NCU03198	Pa_1_9090	putative protein of unknown function	0	-1.33	0.00976
NCU05275	Pa_3_4440	ubiquitin	0	-1.13	0.63158
NCU01485	Pa_3_7050	KOW domain-containing protein	0	1.04	0.26266
NCU02197	Pa_5_460	riboflavin aldehyde-forming enzyme	0	1.24	0.33005
NCU03119		not found in databases
NCU04054	Pa_4_7630	tubulin beta chain	0	1.11	0.0623
NCU08663	Pa_3_670	nonsense-mediated mRNA decay protein 3	0	1.27	4e-05
NCU06725	Pa_2_10230	putative protein of unknown function	0	1.14	0.0024
NCU03058		no ortholog detected in P. anserina
NCU01812		no ortholog detected in P. anserina
NCU08316	Pa_6_3290	DUF221 domain-containing protein	0	-1.24	0.48754
NCU08973	Pa_7_6890	SNARE Ykt6	0	-1.08	0.10476
NCU08193	Pa_7_4480	putative protein of unknown function	1	-2.51	0	-1.41406
NCU09827	Pa_0_640	SET domain-containing protein	0	1.33	0
NCU06210	Pa_7_10630	cytosolic 60S ribosomal protein L28	0	1.06	0.16554
xnc100_240	Pa_7_7390	protein yebC	0	1.17	0.11838
NCU09887		no ortholog detected in P. anserina
NCU09326	Pa_1_12320	cell wall glucanase	0	-1.18	0.08275
NCU05366		not found in databases
NCU09450	Pa_5_11590	26S proteasome regulatory subunit rpn2	0	1.06	0.10758
NCU01469	Pa_2_5130	mitochondrial translation initiation factor	0	-1.11	0.09461
NCU05148		no ortholog detected in P. anserina
NCU00101	Pa_7_8420	protein similar to PBN1 of Neurospora crassa	0	1.09	0.3821
NCU07001	Pa_1_23270	homoserine O-acetyltransferase	0	-1.1	0.02636
NCU04619	Pa_2_3070	C2H2 transcription factor	0	-1.03	0.92239
NCU04097	Pa_2_10840	ABC transporter ATP-binding protein	0	-1.04	0.43952
NCU05689	Pa_7_570	cytochrome c oxidase polypeptide IV	0	1.05	0.29672
NCU08713	Pa_5_925	not in the databases
NCU04447		no ortholog detected in P. anserina
NCU02659	Pa_1_16740	putative protein of unknown function	0	-1.1	0.06822
NCU08454	Pa_6_8825	putative protein of unknown function	0	-1.85	0.01599
NCU00375		no ortholog detected in P. anserina
NCU10507	Pa_1_7080	putative protein of unknown function	0	-1.07	0.6065
NCU07786	Pa_5_6440	putative protein of unknown function	0	-1.07	0.88063
NCU00473	Pa_7_6770	putative protein of unknown function	0	1.43	0.10844
NCU08970		no ortholog detected in P. anserina
NCU07466	Pa_1_6840	cystathionine beta-synthase	0	-1.11	0.2965
NCU01606	Pa_3_8090	ATP synthase subunit 5	0	1.03	0.52872
NCU00873	Pa_3_9590	putative protein of unknown function	0	1.42	0
NCU01486	Pa_3_7220	IKI3 family protein	0	-1.77	0.00926
NCU03084	Pa_1_11960	inosine-uridine preferring nucleoside hydrolase	0	1.1	0.00941
NCU09642	Pa_3_490	sulfate transporter	0	-1.1	0.31825
NCU08954	Pa_2_13100	putative protein of unknown function	0	-1.01	0.85072
NCU07823	Pa_7_11610	scytalone dehydratase	0	-1	0.99988
NCU07549	Pa_7_7810	mitochondrial ribosomal protein L43	0	1.15	0.00556
NCU01740	Pa_3_7000	histone H2A.Z-specific chaperone chz-1	0	-1.18	2e-05
NCU04493		no ortholog detected in P. anserina
NCU06698	Pa_2_5770	glycogenin	0	1.13	0.077
NCU07468	Pa_1_6860	NAD-dependent epimerase/dehydratase	0	-1.1	0.04787
NCU01211	Pa_2_4480	putative protein of unknown function	0	1.31	9e-05
NCU02577	Pa_1_9170	putative protein of unknown function	0	-1.02	0.79378
NCU06256	Pa_7_2250	phosphoglycerate mutase	0	-1.13	0.08321
NCU05534	Pa_5_12340	putative protein of unknown function	0	-1.13	0.02783
NCU00595	Pa_1_15410	ubiquitin thioesterase	0	-1.08	0.56237
NCU05374		not found in databases
NCU08620	Pa_1_8100	cytosolic 40S ribosomal protein S16	0	1.03	0.61515
NCU05886	Pa_5_2320	DUF895 domain membrane protein	0	1.18	0.0342
NCU02181	Pa_1_19930	cytosolic 40S ribosomal protein S4	0	1.15	0.02206
NCU00413	Pa_7_8230	cytosolic 60S ribosomal protein L2	0	1.1	0.06521
NCU00247		no ortholog detected in P. anserina
NCU08553	Pa_7_3840	DNA-directed RNA polymerase II subunit RPB9	0	1.09	0.62109
NCU03778	Pa_7_3200	small nuclear ribonucleoprotein Sm D2	0	-1.02	0.84874
6nc370_160	Pa_4_5920	endosomal peripheral membrane protein	0	-1.09	0.02182
NCU06743	Pa_3_8950	cytosolic 40S ribosomal protein S10	0	-1.02	0.65425
NCU04124	Pa_2_12170	protein CASP	0	-1.35	0
NCU09364	Pa_1_14000	30 kDa heat shock protein	0	-1.01	0.97757
NCU09201	Pa_1_15860	putative protein of unknown function	0	-1.12	0.06864
NCU08678	Pa_3_3080	translation machinery-associated protein 20	0	-1.09	0.13715
NCU03299	Pa_1_7104	not found in databases
xnc152_030		no ortholog detected in P. anserina
NCU09175	Pa_7_1340	glucan 1,3-beta-glucosidase	0	1.09	0.17206
NCU01311	Pa_2_2590	putative protein of unknown function	0	1.53	0.28083
NCU02712	Pa_1_13790	acetate kinase	0	1.08	0.41945
NCU08502	Pa_3_7630	cytosolic 40S ribosomal protein S6	0	1.05	0.42158
NCU08766	Pa_7_4900	kinase activator	0	1.02	0.71126
NCU07608	Pa_3_2460	ribose-5-phosphate isomerase	1	-1.95	0	-1.3393
7nc508_050	Pa_5_5380	LYR family protein	0	1.08	0.11247
NCU07825	Pa_7_11580	putative protein of unknown function	0	1.34	0.56508
NCU06402	Pa_6_6020	C-4 methylsterol oxidase	0	-1.11	0.02212
NCU08947	Pa_2_12750	ubiquinol-cytochrome C reductase complex subunit UcrQ	0	1.11	0.04128
NCU00636	Pa_1_14370	mitochondrial ATP synthase D chain	0	1.03	0.73041
NCU04037	Pa_4_7840	glycolipid 2-alpha-mannosyltransferase	0	-1.79	0.07286
NCU02903	Pa_1_590	integral membrane protein	0	-1.39	3e-05
NCU07654	Pa_3_2360	pre-mRNA polyadenylation factor fip-1	0	-1.4	1e-05
NCU01781		no ortholog detected in P. anserina
NCU04349	Pa_3_3580	kinase	0	-1.19	0.02746
NCU00258	Pa_7_4580	cytosolic 40S ribosomal protein S7	0	1.06	0.32712
NCU02289	Pa_5_9570	ubiquitin-conjugating enzyme E2-16 kDa	0	1.06	0.46531
NCU00903		no ortholog detected in P. anserina
NCU03873	Pa_4_2880	GPI anchored protein	0	-1.06	0.22765
NCU08090		no ortholog detected in P. anserina
NCU03495	Pa_6_4190	protein phosphatase 2c	0	-1.02	0.76998
b21d9_120		not found in databases
NCU04411	Pa_6_890	anthranilate phosphoribosyltransferase	0	1.04	0.67853
NCU04120	Pa_2_12290	calmodulin	0	-1.09	0.08731
NCU02013	Pa_1_19620	DUF1690 domain-containing protein	0	-1.15	0.00036
NCU06350		no ortholog detected in P. anserina
NCU01911	Pa_1_21120	GDP/GTP exchange factor Sec2p	0	-1.34	0.16166
NCU01453	Pa_2_5320	Ras-related protein Rab-18	0	-1.27	0.00111
NCU05644	Pa_4_4750	GPI transamidase component GPI16	0	-1.05	0.38805
NCU00777	Pa_1_5750	methyltransferase	0	-1	0.96492
NCU09208	Pa_1_16050	transcription factor SPT8	0	1.02	0.87973
NCU03528	Pa_3_5790	DNA polymerase delta subunit 4	0	-1.44	0.0012
NCU03757	Pa_2_5920	cytosolic 60S ribosomal protein L4A	0	1.04	0.54543
NCU02740	Pa_1_13580	putative protein of unknown function	0	-1.04	0.6388
NCU02497	Pa_1_4660	DNA polymerase V	0	1.24	0
NCU08332	Pa_1_17000	Woronin body major protein precursor HEX1	0	1.11	0.10296
NCU09244	Pa_1_11380	putative protein of unknown function	0	-1.02	0.83571
NCU01511	Pa_3_4980	urease accessory protein ureG	0	-1.39	0.00045
NCU01999	Pa_1_20210	putative protein of unknown function	0	-1.1	0.06997
NCU04036	Pa_4_7860	putative protein of unknown function	0	1.04	0.68155
NCU02091	Pa_1_3410	alpha mannosidase-like protein	0	-1.27	0.01181
NCU03670	Pa_2_3420	phospholipase A2	0	1.13	0.28887
NCU03863	Pa_4_2930	putative protein of unknown function	0	1.09	0.31106
NCU09794	Pa_4_4810	NAD-binding Rossmann fold oxidoreductase family protein	0	1.13	0.01045
NCU03485	Pa_6_3860	signal recognition particle SEC65 subunit	0	1.03	0.72392
NCU05768		no ortholog detected in P. anserina
NCU01546	Pa_3_5260	coproporphyrinogen III oxidase	0	1.01	0.79514
NCU07492	Pa_1_6750	WD repeat protein	0	-1.05	0.19613
NCU00525		no ortholog detected in P. anserina
NCU07405	Pa_1_10340	putative protein of unknown function	0	-1.21	0.17746
NCU00385	Pa_7_2170	ATP synthase subunit delta	0	1.06	0.11776
NCU01949	Pa_1_20670	40S ribosomal protein S9	0	1.1	0.02771
NCU08290	Pa_6_6180	protein Ku70	0	1.29	0
NCU08557		no ortholog detected in P. anserina
NCU00727	Pa_1_4910	RNA polymerase III subunit Rpc34	0	1.13	0.06803
NCU05126	Pa_5_1840	putative protein of unknown function	0	-1.08	0.87592
NCU00067	Pa_7_9230	dolichyl-phosphate mannosyltransferase polypeptide 2	0	1.05	0.64372
NCU03018	Pa_1_7790	small nucleolar ribonucleoprotein complex subunit	0	1.33	0
NCU08330	Pa_6_3260	ThiJ/PfpI family protein	0	-1.11	0.06608
NCU09288	Pa_5_4550	cyclin	0	1.01	0.89743
NCU00856	Pa_1_920	putative protein of unknown function	0	-1.01	0.79019
NCU01699	Pa_3_6720	putative protein of unknown function	0	-1.07	0.30224
NCU03151	Pa_1_14500	peroxiredoxin	0	-1	0.9634
NCU10156		no ortholog detected in P. anserina
NCU06496	Pa_7_7930	Nucleolar protein required for normal metabolism of the rRNA	0	1.4	0.04913
NCU02902		no ortholog detected in P. anserina
NCU08962	Pa_2_13170	putative protein of unknown function	0	-1.46	4e-05
NCU04282		no ortholog detected in P. anserina
NCU04334	Pa_3_3470	10 kDa heat shock protein, mitochondrial	0	-1.21	0.00255
NCU06518	Pa_3_1420	NADH-cytochrome b5 reductase 2	0	1.16	0.10395
NCU04331	Pa_2_12840	cytosolic 60S ribosomal protein L5	0	1.1	0.06491
4nc455_190	Pa_3_3570	DUF323 domain-containing protein	0	-1.33	5e-05
NCU05842	Pa_5_1060	SAM dependent methyltransferase	0	-1.14	0.00188
NCU02707	Pa_1_13420	cytosolic 60S ribosomal protein L6	0	1.04	0.54243
NCU04273	Pa_2_12430	RNA binding protein Rnp24	0	-1.05	0.37208
NCU09992	Pa_2_13780	endoprotease Endo-Pro-Aspergillus niger	0	1.24	0.03311
NCU00992	Pa_1_810	putative protein of unknown function	0	1.26	0.0536
NCU00225	Pa_7_2800	telomere and ribosome associated protein Stm1	0	1	0.9761
NCU01634	Pa_6_5340	histone H4	0	1.11	0.06767
NCU05429	Pa_6_5600	1,4-alpha-glucan-branching enzyme	0	1.17	0.00486
NCU02273	Pa_5_9000	vacuolar protease A	0	-1.1	0.12174
NCU08616	Pa_1_8070	DNA-directed RNA polymerase I subunit	0	1.29	0
NCU06035	Pa_5_4910	elongation factor 1-beta	0	1.12	0.02274
NCU07204		no ortholog detected in P. anserina
NCU07904	Pa_6_8150	short chain dehydrogenase/reductase	0	1.02	0.63871
NCU01902	Pa_1_21030	glucosamine 6-phosphate N-acetyltransferase	0	-1.14	0.0034
NCU06029	Pa_5_4890	pantetheine-phosphate adenylyltransferase	0	-1.06	0.20456
NCU01002	Pa_2_1660	coatomer epsilon subunit	0	-1.01	0.84874
NCU02016	Pa_1_19590	putative protein of unknown function	0	-1.01	0.92729
NCU07543	Pa_7_7740	transcription factor tfiiib component	0	-1.08	0.20456
NCU05134	Pa_4_2215	putative protein of unknown function	0	-1.22	0
NCU03135		no ortholog detected in P. anserina
NCU00744	Pa_1_6210	integral membrane protein	0	1.03	0.68983
NCU06117	Pa_5_8620	putative protein of unknown function	0	1.02	0.86047
NCU00963	Pa_1_16780	methylenetetrahydrofolate dehydrogenase [NAD+]	0	1.1	0.03374
NCU08948	Pa_2_12740	NIF domain-containing protein	1	-2.01	0.00187
NCU07342	Pa_3_8770	putative protein of unknown function	0	-1.2	0.3524
NCU03480	Pa_6_3880	related to tpa inducible protein	0	1.1	0.05255
NCU07829	Pa_7_11540	cytosolic 60S ribosomal protein L7	0	1.06	0.21176
NCU05841	Pa_5_1060	SAM dependent methyltransferase	0	1.1	0.26986
NCU00635	Pa_1_14360	nascent polypeptide-associated complex subunit alpha	0	1.18	0.00036
NCU01195	Pa_2_6020	glutamate dehydrogenase	0	1.13	0.14187
NCU05319	Pa_5_1130	LysM domain-containing protein	0	1.26	0.49635
NCU06145	Pa_5_11510	Zinc finger protein	0	1.03	0.67607
NCU04823	Pa_4_9480	NADP-dependent alcohol dehydrogenase	0	1.2	0.17602
NCU06123	Pa_5_8670	phosphoketolase	1	1.5	8e-05	-1.23084
NCU02856		no ortholog detected in P. anserina
NCU06843	Pa_3_7270	cytosolic 60S ribosomal protein L3	0	1.03	0.6724
NCU05236	Pa_1_24280	putative protein of unknown function	0	-1.02	0.5748
NCU05707	Pa_5_12170	putative protein of unknown function	0	1.1	0.84834
NCU03607	Pa_2_1060	serine racemase	0	-1.04	0.88494
NCU00502	Pa_1_17630	ATP synthase subunit 4	0	1.1	0.00892
NCU06954		no ortholog detected in P. anserina
NCU04759	Pa_4_8480	nuclear transport factor 2	0	1.04	0.42081
NCU03479	Pa_6_3890	endoribonuclease YSH1	0	1.01	0.8938
NCU09191	Pa_1_17010	putative protein of unknown function	1	-1.9	0	-1.22513
NCU08067	Pa_6_10750	osmosensor protein	0	-1.07	0.46683
NCU04486	Pa_6_6745	putative protein of unknown function	0	1.05	0.2732
NCU09853	Pa_2_13370	putative protein of unknown function	0	1.02	0.85393
NCU09922	Pa_1_22910	putative protein of unknown function	0	1.08	0.0478
NCU03040	Pa_1_17800	N-glycosylase/DNA lyase	0	-1.04	0.74053
NCU07722	Pa_6_3160	Serine/threonine-protein kinase RIO2	0	1.39	0.00759
NCU08605	Pa_1_8240	proteasome subunit	0	1.03	0.55843
NCU09991		no ortholog detected in P. anserina
NCU00811	Pa_1_5270	putative protein of unknown function	0	-1.18	0.00025
NCU04843	Pa_4_9550	putative protein of unknown function	1	1.82	0	-1.21497
NCU02971		not found in databases
NCU03739	Pa_2_11990	disulfide-isomerase	0	1.07	0.07801
NCU04931	Pa_1_13180	putative protein of unknown function	0	-1.03	0.82432
NCU10459		no ortholog detected in P. anserina
NCU00236	Pa_7_2840	flavoprotein oxygenase	0	-1.06	0.5512
NCU04276	Pa_2_12340	putative protein of unknown function	0	1.02	0.93906
NCU05037	Pa_5_7350	dihydrodipicolinate synthase	0	-1.49	0.00036
NCU01529		no ortholog detected in P. anserina
NCU03109	Pa_1_11660	putative protein of unknown function	0	-1	0.93906
NCU08762	Pa_7_3210	delta(14)-sterol reductase	0	-1.04	0.3723
NCU04929		no ortholog detected in P. anserina
NCU00947		no ortholog detected in P. anserina
NCU03320		no ortholog detected in P. anserina
NCU06062	Pa_5_4760	aerobactin siderophore biosynthesis protein iucB	0	-1.48	0.00052
NCU04002	Pa_4_2520	SWR1-complex protein 4	0	-1.58	0.00666
NCU07062	Pa_4_6850	protein kinase	0	-1.09	0.47638
NCU03393	Pa_6_4950	cytosolic 40S ribosomal protein S0	0	1.06	0.36754
NCU06897		no ortholog detected in P. anserina
NCU02016	Pa_1_19590	putative protein of unknown function	0	-1.01	0.92729
NCU02804	Pa_1_7960	60S ribosomal protein L25	0	1.17	0.00436
NCU01113		no ortholog detected in P. anserina
NCU06579	Pa_6_820	rho guanyl nucleotide exchange factor	0	-1.51	0.09922
NCU09908		no ortholog detected in P. anserina
NCU00168	Pa_7_10680	1-acylglycerol-3-phosphate O-acyltransferase	0	-1.28	0.3539
NCU01491	Pa_3_7180	putative protein of unknown function	0	1.11	0.03346
NCU07905		no ortholog detected in P. anserina
NCU03948	Pa_4_2580	amidohydrolase	0	1.02	0.66386
NCU00449	Pa_3_10940	putative protein of unknown function	0	-1.05	0.73979
NCU04116	Pa_2_12330	DUF618 domain-containing protein	0	1.01	0.89142
NCU02453	Pa_5_5290	RPEL repeat protein	0	1.05	0.46069
NCU00649	Pa_1_2320	nicotinate phosphoribosyltransferase	0	-1.06	0.6082
NCU00629	Pa_1_14910	6-phosphofructokinase	0	-1.18	3e-05
NCU00478	Pa_7_6780	cAMP-specific 3',5'-cyclic phosphodiesterase	0	-1.1	0.10924
NCU00018	Pa_7_5590	cell division control protein cdc48	0	1.01	0.74829
NCU06841		no ortholog detected in P. anserina
NCU07129		no ortholog detected in P. anserina
NCU08755	Pa_7_3190	beta glucosidase	0	-1.18	0.00013
NCU03849	Pa_1_10750	DNA helicase	0	1.07	0.4708
NCU06558	Pa_6_8470	D-amino-acid oxidase	0	1.35	1e-05
NCU02405	Pa_5_5790	signal recognition particle 14kD protein	0	1.05	0.75206
NCU05625	Pa_4_5800	putative protein of unknown function	0	-1.19	0.43827
NCU01913	Pa_1_20980	pre-mRNA-splicing factor	0	1.12	0.04532
NCU07768	Pa_7_11115	short-chain dehydrogenase/reductase SDR	0	-1.04	0.75331
NCU04491	Pa_6_6745	putative protein of unknown function	0	1.05	0.2732
NCU06946	Pa_5_12820	ABC transporter	0	1.24	0.00017
NCU01938	Pa_1_20780	transcription factor RfeG	0	-1.19	0.00473
NCU04287		no ortholog detected in P. anserina
NCU09020	Pa_5_1970	putative protein of unknown function	0	-1.02	0.89438
NCU08987		no ortholog detected in P. anserina
NCU04700		no ortholog detected in P. anserina
NCU04259	Pa_2_9850	ABC1 family protein	0	1.18	0.02086
NCU07494	Pa_1_8820	ribosome recycling factor	0	-1.04	0.37127
NCU04261	Pa_2_9870	putative protein of unknown function	0	-1.19	0.0178
b21o8_070		not found in databases
NCU09702	Pa_5_3310	endo-beta-1,6-galactanase	0	1.34	0.16479
NCU09731	Pa_6_1580	ubiquitin-conjugating enzyme	0	-1.04	0.47659
NCU02821	Pa_5_3090	integral membrane protein	0	1.17	0.19835
NCU08197	Pa_7_4450	cytochrome P450 E-class, group I	0	1.02	0.87592
NCU05632		no ortholog detected in P. anserina
NCU03918	Pa_4_8320	putative protein of unknown function	0	-1.49	1e-05
NCU01049	Pa_1_19690	beta-Ig-H3/Fasciclin	0	-1.06	0.43045
NCU08049	Pa_2_8090	putative protein of unknown function	0	1.1	0.1925
NCU02165	Pa_1_19040	putative protein of unknown function	0	-1.21	0.00015
NCU00962	Pa_1_16950	RNA polymerase II mediator complex component Srb8	0	-1.27	0.135
NCU09345		no ortholog detected in P. anserina
NCU09593		no ortholog detected in P. anserina
NCU09542	Pa_2_8590	impact family protein	0	1.04	0.73943
NCU04601		no ortholog detected in P. anserina
NCU07200	Pa_2_14170	metalloprotease	0	1.24	0.01242
NCU09358		no ortholog detected in P. anserina
NCU02294	Pa_5_9610	SCF apoptosis response protein	0	-1.14	0.19914
NCU03554	Pa_6_4670	putative protein of unknown function	0	-1.28	0.00181
NCU02571	Pa_1_8990	acetyl-CoA acetyltransferase	0	-1.05	0.45763
NCU01446	Pa_2_5270	uracil phosphoribosyltransferase	0	1.15	0.30678
NCU06482	Pa_7_10050	pyruvate dehydrogenase E1 component subunit alpha	0	1.03	0.96006
NCU06917		no ortholog detected in P. anserina
NCU07526		no ortholog detected in P. anserina
NCU05757	Pa_4_1370	nitrilase	0	-1.05	0.5348
NCU09094	Pa_1_19820	pre-rRNA-processing protein ipi1	0	1.08	0.25371
NCU06859	Pa_5_8710	RNA polymerase II associated protein	1	-1.59	0.00278	-1.15546
NCU09980	Pa_1_22260	DUF255 domain-containing protein	0	-1.16	0.09497
NCU04906	Pa_5_1060	SAM dependent methyltransferase	0	-1.14	0.00188
NCU08676	Pa_3_3070	putative protein of unknown function	0	1	0.94587
NCU02150	Pa_1_17430	Ser/Thr protein phosphatase	0	-1.17	0.32567
NCU02686	Pa_1_13250	putative protein of unknown function	0	1.11	0.23471
NCU08055		no ortholog detected in P. anserina
NCU06246	Pa_7_8870	RNA helicase	0	1.16	0.01036
NCU09492	Pa_3_9750	SH3 and Ded_cyto domain-containing protein	0	-1.25	0.03955
x4g11_020	Pa_4_4640	non-ribosomal peptide synthetase modules and related proteins	0	1.48	0
NCU01353	Pa_2_1570	mixed-linked glucanase	0	1.48	0
NCU05630	Pa_4_5690	cupin domain-containing protein	0	-1.09	0.01383
NCU09700	Pa_5_3250	T-complex protein 1 subunit eta	0	-1.04	0.5012
NCU01085	Pa_2_7770	putative protein of unknown function	0	1.01	0.94296
NCU06635		no ortholog detected in P. anserina
NCU04638	Pa_2_400	putative protein of unknown function	0	1.26	0.35456
NCU07807	Pa_0_710	fructose-bisphosphate aldolase	0	-1.01	0.78166
NCU03931	Pa_3_6620	C6 transcription factor	0	1.54	0.21915
NCU06746	Pa_3_8345	putative protein of unknown function	1	-1.8	0	-1.14487
NCU03815	Pa_2_9510	amino acid transporter	0	1.15	0.01713
NCU07575	Pa_7_7100	C6 finger domain protein	0	1.16	0.08414
NCU05338	Pa_6_11520	putative protein of unknown function	0	1.06	0.51589
NCU06416	Pa_7_10290	thymine dioxygenase	1	-1.74	1e-05	-1.14185
NCU06362	Pa_1_22560	GTPase activating protein	0	1.17	0.16201
NCU01656	Pa_3_6830	WD repeat protein	0	-1.05	0.26566
NCU04339	Pa_3_3540	ribokinase	1	-1.56	0	-1.1372
NCU07045	Pa_3_2960	putative protein of unknown function	0	-1.11	0.33846
NCU07881	Pa_7_11130	putative protein of unknown function	0	-1.08	0.27745
NCU00093		no ortholog detected in P. anserina
NCU05617	Pa_4_6030	putative protein of unknown function	0	1.14	0.00225
NCU05946		no ortholog detected in P. anserina
NCU00654	Pa_1_20050	putative protein of unknown function	0	-1.11	0.13856
NCU06218	Pa_7_10560	DUF803 domain membrane protein	0	-1.05	0.74078
NCU03394	Pa_6_4930	ribosomal protein S15	0	1.1	0.05117
NCU04583	Pa_7_4100	acetyltransferase	0	1.09	0.41402
NCU08000	Pa_6_1270	cutinase transcription factor 1 alpha	0	-1.11	0.01758
NCU05618		no ortholog detected in P. anserina
NCU09701		no ortholog detected in P. anserina
NCU07360	Pa_1_18140	DnaJ domain-containing protein	0	1	0.98495
NCU08915		no ortholog detected in P. anserina
NCU03256		not found in databases
NCU08161	Pa_5_2380	histone chaperone RTT106	0	-1.02	0.81829
NCU05259	Pa_3_4190	fatty acid desaturase	0	1.17	0.10361
NCU06854	Pa_6_5670	RuvB-like helicase 2	0	-1.02	0.56237
NCU06549	Pa_6_8350	glutamine amidotransferase subunit pdxT	0	-1.06	0.29321
NCU00135	Pa_7_9040	phosphatidyl synthase	0	-1.31	4e-05
NCU06332	Pa_1_23240	alpha/beta hydrolase	0	-1	0.97087
NCU00074	Pa_7_9310	putative protein of unknown function	0	1.17	0.04613
NCU00160	Pa_7_5900	NADH:ubiquinone oxidoreductase 6.6kD subunit	0	1.05	0.42833
NCU05014	Pa_1_1430	thiamin pyrophosphokinase	0	-1.09	0.12668
NCU00804		no ortholog detected in P. anserina
NCU07156	Pa_2_13640	imidazole glycerol phosphate synthase hisHF	0	1.04	0.57265
NCU04114	Pa_2_12310	putative protein of unknown function	0	1.16	0.00298
NCU03156	Pa_1_14540	NADH-ubiquinone oxidoreductase	0	1.11	0.11032
NCU03067		no ortholog detected in P. anserina
NCU00251	Pa_7_4600	calpain clp-1	0	-1.18	0.01333
NCU08940	Pa_2_12970	ubiquinol-cytochrome c reductase complex protein	0	1.05	0.45879
NCU05855		no ortholog detected in P. anserina
NCU10941		no ortholog detected in P. anserina
NCU07853	Pa_7_11330	uricase	0	-1.28	0.02219
NCU06017	Pa_6_30	thiosulfate sulfurtransferase	0	1.12	0.12156
NCU06493	Pa_7_7970	guanine nucleotide-binding protein subunit alpha	0	-1.18	0.00627
NCU00484	Pa_7_6660	NADH-ubiquinone oxidoreductase	0	1.08	0.08969
NCU08409	Pa_3_11330	tryptophan synthase	0	1.01	0.86362
NCU00306	Pa_7_5740	synaptic vesicle transporter SVOP and related transporters	0	-1.09	0.51511
NCU07456	Pa_1_9820	riboflavin synthase alpha chain	0	-1.12	0.05645
NCU02819	Pa_1_7390	putative protein of unknown function	0	1.06	0.4959
NCU03661	Pa_2_10450	GTPase-activating protein GYP7		-1.29	0.00378
NCU03612		not found in databases
NCU03366	Pa_3_5970	G2/M phase checkpoint control protein Sum2	0	-1.05	0.46333
NCU00349	Pa_7_1768	not found in databases
NCU03831		no ortholog detected in P. anserina
NCU07111	Pa_3_10790	metallo-beta-lactamase domain-containing protein	1	-1.81	0	-1.10661
NCU01369	Pa_2_8940	ATP-dependent RNA helicase DED1	0	-1.01	0.89743
NCU08210		no ortholog detected in P. anserina
NCU08416	Pa_3_10550	DUF1674 domain-containing protein	0	1.11	0.04234
NCU08667		no ortholog detected in P. anserina
NCU01306		no ortholog detected in P. anserina
NCU05192		no ortholog detected in P. anserina
NCU01783	Pa_3_8400	phosphatidylinositol N-acetylglucosaminyltransferase	0	-1.29	0.00593
NCU09264	Pa_1_7680	APAF1-interacting protein	0	1.06	0.5108
NCU07337	Pa_6_350	stress response RCI peptide	0	-1.67	0.02024
NCU02473	Pa_1_22290	nucleoporin	0	1.1	0.00354
NCU05163		no ortholog detected in P. anserina
NCU00175	Pa_7_10710	putative protein of unknown function	0	-1	0.99814
NCU01981	Pa_1_20390	translation initiation factor SUI1	0	1.05	0.72358
NCU02922		no ortholog detected in P. anserina
NCU06086	Pa_5_8550	regulatory protein suaprga1	1	-1.74	0	-1.0926
NCU02041		no ortholog detected in P. anserina
NCU02910	Pa_5_7880	putative protein of unknown function	0	1.01	0.9629
NCU06397	Pa_3_4810	profilin	0	1.18	0.03417
NCU03369	Pa_3_5980	pirin	0	1.12	0.08921
NCU08892	Pa_2_6590	putative protein of unknown function	0	-1.05	0.53284
NCU05026		not found in databases
NCU01860	Pa_1_22100	aos20	0	-1.4	0.55425
NCU05943	Pa_4_5210	PHD finger domain protein	0	-1.26	0.02346
NCU04796	Pa_4_9350	3-ketoacyl-CoA thiolase	0	-1.07	0.82247
NCU08044	Pa_6_2210	short-chain dehydrogenase	0	1	0.94237
NCU01753	Pa_3_7450	gamma-glutamyltranspeptidase	0	1.16	0.00954
NCU06884	Pa_5_8190	LipA and NB-ARC domain-containing protein	0	1.13	0.20523
NCU09482	Pa_3_10310	putative protein of unknown function	0	-1	0.98409
NCU05404	Pa_3_9420	endoglucanase	0	-1.04	0.50184
NCU00162	Pa_7_5360	lectin family integral membrane protein	0	-1.04	0.44451
NCU09875	Pa_1_620	putative protein of unknown function	1	1.59	0	-1.08175
NCU09924	Pa_5_950	BNR/Asp-box repeat domain protein	0	1.07	0.72156
NCU04349	Pa_3_3580	kinase	0	-1.19	0.02746
NCU06336	Pa_1_22820	N2,N2-dimethylguanosine tRNA methyltransferase	0	1.13	0.00348
NCU03347	Pa_3_5900	kynurenine aminotransferase	0	1.04	0.36511
NCU04635	Pa_2_440	mismatched base pair and cruciform DNA recognition protein	0	1.12	0.01647
NCU07942	Pa_3_1790	ribosomal RNA processing protein	0	1.22	2e-05
NCU09800	Pa_3_2440	taurine dioxygenase	0	-1.2	0.04553
NCU07490		not found in databases
NCU08904	Pa_2_6770	20S-pre-rRNA D-site endonuclease NOB1	0	1.19	0.03724
NCU01149		no ortholog detected in P. anserina
NCU03375		no ortholog detected in P. anserina
NCU07235	Pa_5_2870	putative protein of unknown function	0	-1.02	0.75371
NCU03971	Pa_4_6740	mRNA cap methyltransferase	0	1.05	0.63996
NCU01791	Pa_3_8700	vacuolar sorting protein Vps24	0	-1.02	0.91649
NCU03998	Pa_4_2540	AP-3 adaptor complex subunit mu	0	-1.06	0.56395
NCU03638	Pa_2_9460	60S ribosomal protein L34	0	1.19	0.02381
NCU06862		no ortholog detected in P. anserina
NCU04010	Pa_4_2670	malonyl CoA-acyl carrier protein transacylase	0	-1.09	0.5451
NCU07253	Pa_6_9520	glucanosyltransferase	0	-1.11	0.0245
NCU05945	Pa_4_5190	putative protein of unknown function	0	1.03	0.73733
NCU09923	Pa_1_4810	beta-xylosidase	0	-1.16	0.47717
NCU07956	Pa_3_1680	pre-rRNA-processing protein PNO1	0	1.12	0.00176
NCU09842	Pa_2_13340	MAP kinase	0	-1.05	0.53504
NCU08014		no ortholog detected in P. anserina
NCU01555	Pa_3_5330	putative protein of unknown function	0	-1.16	0.5318
NCU07268	Pa_6_9250	putative protein of unknown function	0	-1.21	0.0001
NCU07567	Pa_7_7200	T-complex protein 1 subunit theta	0	1.04	0.29855
NCU04218	Pa_1_19750	RTA1 domain-containing protein	1	1.79	0.00027	-1.06625
NCU02437	Pa_5_5390	histone H2A	0	1.16	0.03792
NCU01309	Pa_2_2570	putative protein of unknown function	0	-1.07	0.13815
NCU03303	Pa_1_7050	UBX domain protein	0	-1.16	0.03179
NCU03794	Pa_2_11820	periodic tryptophan protein 2	0	1.05	0.32771
NCU02829	Pa_1_7430	phosphomannomutase	0	-1.22	0.00018
NCU07196	Pa_2_14200	dynactin subunit 5	0	-1.05	0.64834
NCU09594	Pa_6_4790	seryl-tRNA synthetase	0	-1.18	0.00965
NCU08439	Pa_3_11220	multidrug resistance protein	1	-1.75	0	-1.06148
NCU07427		no ortholog detected in P. anserina
NCU05408	Pa_5_7200	salicylate hydroxylase	0	1.2	0.01215
NCU03737	Pa_2_12010	elongation factor Tu	0	1	0.9495
NCU05967	Pa_4_7520	cytochrome P450	0	1.15	0.05685
NCU05092		no ortholog detected in P. anserina
NCU02164	Pa_1_19050	putative protein of unknown function	0	-1.19	0.00033
NCU03882	Pa_4_2800	dynein	0	-1.08	0.27379
NCU08374	Pa_1_9340	putative protein of unknown function	0	1.01	0.94533
NCU01859	Pa_1_22030	NADH-ubiquinone oxidoreductase 21 kDa subunit	0	-1.1	0.01995
NCU00680	Pa_1_17280	2-methylcitrate dehydratase	0	-1.07	0.46183
NCU09001	Pa_7_7660	CCR4-NOT transcription complex subunit 7	0	1.09	0.22288
NCU08079		no ortholog detected in P. anserina
NCU07962	Pa_3_1640	CFEM domain protein	1	-1.51	0	-1.05385
NCU00059	Pa_7_9420	ribosome biogenesis protein Rix1	0	1.16	0.00297
NCU09699	Pa_5_3240	histone acetyltransferase Spt10	0	-1.14	0.01028
NCU06726	Pa_2_10240	hydrolase	0	-1.1	0.25772
NCU00716	Pa_5_12830	non-anchored cell wall protein-5	0	-1.2	0.03806
NCU00929	Pa_1_1560	putative protein of unknown function	0	-1.25	0.06351
NCU06742	Pa_3_8960	putative protein of unknown function	0	-1.34	0.00019
NCU01769	Pa_3_7760	putative protein of unknown function	0	1	0.9714
NCU06821	Pa_3_7410	CRO1 protein	0	-1.3	0.00589
NCU05277		no ortholog detected in P. anserina
NCU02250	Pa_5_9140	ATP synthase protein	0	-1.29	1e-05
NCU09007		no ortholog detected in P. anserina
NCU03669	Pa_2_3430	RNA methyltransferase	0	1.11	0.03505
NCU04810	Pa_4_9225	not found in databases
NCU02435	Pa_5_5410	histone H2B	0	1.05	0.51735
NCU05733	Pa_6_11340	acriflavine sensitivity control protein acr-2	0	1.06	0.40846
NCU00166	Pa_7_2020	isochorismatase domain-containing protein	0	-1.3	2e-05
NCU06489	Pa_7_9580	WD repeat protein	0	1.01	0.86828
NCU10680	Pa_4_7080	lipase	0	1.18	0.09051
NCU00845	Pa_5_5620	putative protein of unknown function	0	1.16	0.01821
NCU01900	Pa_1_21018	not found in databases
NCU04340	Pa_3_3520	acetyltransferase	0	-1.24	0.06792
NCU04594	Pa_2_390	4-carboxymuconolactone decarboxylase	0	1.13	0.05335
NCU06528		not found in databases
NCU03779	Pa_6_1010	dihydroxyacetone kinase	0	1.13	0.20816
NCU03208		no ortholog detected in P. anserina
NCU00211	Pa_7_2530	mitochondrial ribosomal protein subunit L31	0	1.01	0.79159
NCU04618	Pa_2_210	putative protein of unknown function	0	-1.01	0.94048
NCU03435	Pa_6_4820	putative protein of unknown function	0	-1	0.9629
NCU05288	Pa_3_4200	rab GDP-dissociation inhibitor	0	-1.12	0.02634
NCU07791	Pa_2_4000	Amt4	0	-1.26	0.02384
NCU09410	Pa_5_3050	putative protein of unknown function	0	1.42	0
NCU06869	Pa_5_8800	cleavage and polyadenylation specificity factor subunit 2	0	-1.12	0.17767
NCU09604		no ortholog detected in P. anserina
NCU02019	Pa_1_19560	FAD dependent oxidoreductase	0	-1.06	0.66086
NCU05722	Pa_1_5980	putative protein of unknown function	0	-1.02	0.88829
NCU00620	Pa_1_14770	putative protein of unknown function	0	1	0.97436
NCU07498	Pa_1_9750	DNA-repair protein rad13	0	-1.48	0.00124
NCU08262		no ortholog detected in P. anserina
NCU04609	Pa_2_650	pentatricopeptide repeat protein	0	1.04	0.46891
NCU03950	Pa_4_2570	putative protein of unknown function	0	-1.27	0.04958
NCU07439	Pa_1_19355	putative protein of unknown function	0	-1.22	0.55186
NCU09685	Pa_2_7280	putative protein of unknown function	0	-1.1	0.15875
NCU04253		no ortholog detected in P. anserina
NCU08648	Pa_1_16910	nuclease S1	0	1.14	0.00489
NCU04328	Pa_2_12870	mlo2	0	-1.02	0.68544
NCU02626	Pa_1_4490	kinesin	0	-1.16	0.37524
NCU00950	Pa_1_7360	tRNA-dihydrouridine synthase	0	-1.19	0.03857
NCU03528	Pa_3_5790	DNA polymerase delta subunit 4	0	-1.44	0.0012
NCU03939		not found in databases
NCU09095	Pa_1_19810	dynein light chain roadblock-type 2	0	1.06	0.42591
NCU06793	Pa_3_9490	putative protein of unknown function	0	1.42	0.47706
NCU07913		no ortholog detected in P. anserina
NCU02540	Pa_1_8700	sphingolipid long chain base-responsive protein PIL1	0	-1.12	0.75571
NCU09228	Pa_1_10550	aminopeptidase	0	1.01	0.84683
NCU05457	Pa_6_5480	cytochrome c oxidase subunit V	0	-1.04	0.31947
NCU06757	Pa_3_8130	DNA polymerase iota	0	-1.08	0.1354
NCU07184		no ortholog detected in P. anserina
NCU04600	Pa_2_280	protein phosphatase 2C	0	-1.17	0.00158
2nc610_080	Pa_5_7420	putative protein of unknown function	0	1.16	0.01485
NCU07069	Pa_4_8210	pre-RNA splicing factor Srp2	0	-1.09	0.13472
NCU06958	Pa_6_9490	putative protein of unknown function	0	1.06	0.61515
NCU03281	Pa_1_4220	ctr copper transporter	0	1.07	0.06737
NCU02474		no ortholog detected in P. anserina
NCU05488	Pa_4_3880	Vip1 protein	0	-1.8	0.01127
NCU03727	Pa_2_9440	ham-2 protein required for hyphal anastomosis	1	-1.92	0.00473	-1.01925
NCU00527	Pa_1_15480	mitochondrial genome maintenance protein Mgr2	0	1.14	0.01607
NCU09483	Pa_3_10300	putative protein of unknown function	0	-1.29	0.02574
NCU03222	Pa_1_9910	putative protein of unknown function	0	-1.05	0.45778
NCU06393	Pa_6_6000	AAA family ATPase	0	1.03	0.60032
NCU07078	Pa_4_8000	OB-fold nucleic acid binding domain-containing protein	0	-1.18	0.55517
NCU04649	Pa_2_3140	COQ10 protein	0	-1.11	0.04924
NCU04812	Pa_4_9485	not found in databases
NCU08629		no ortholog detected in P. anserina
NCU04693	Pa_4_8660	flavin-nucleotide-binding protein	0	-1.13	0.10857
NCU11076	Pa_6_4130	integral membrane protein	0	1.09	0.0612
NCU02905	Pa_1_610	60S ribosomal protein L23	0	1.15	0.02964
NCU04524		no ortholog detected in P. anserina
NCU00022	Pa_7_5670	putative protein of unknown function	0	1.03	0.73979
NCU09680	Pa_0_1250	exoglucanase-6A	0	-1.03	0.87588
NCU01597		no ortholog detected in P. anserina
NCU09033	Pa_4_960	C6 transcription factor	0	-1.25	0.01337
NCU00472	Pa_7_6990	CDC37	0	-1.47	0.00024
NCU07188	Pa_2_13810	GTP cyclohydrolase-2	0	1.07	0.23235
NCU02624	Pa_1_4470	cytochrome P450 51	0	1.01	0.91989
NCU08182		no ortholog detected in P. anserina
NCU05983	Pa_4_6910	3,4-dihydroxy-2-butanone 4-phosphate synthase	0	1.05	0.82061
NCU06101	Pa_5_8310	putative protein of unknown function	0	-1.05	0.22531
NCU04187	Pa_2_10900	cap binding protein	0	-1.23	0.00018
NCU06783	Pa_3_9300	ATP citrate lyase	0	-1.01	0.81968
NCU09028	Pa_0_840	Glycoside Hydrolase Family 47	0	1.04	0.66552
NCU06761	Pa_3_7920	sphingosine-1-phosphate lyase	1	-2.07	0.00013	-1.0085
NCU02855	Pa_1_250	Glycoside Hydrolase Family 11	0	-1.03	0.84629
NCU00209	Pa_7_2510	putative protein of unknown function	0	-1.03	0.55246
NCU02263	Pa_5_9220	Sec14 cytosolic factor	0	-1.11	0.00601
NCU00249	Pa_7_4620	aspartic proteinase	0	1.14	0.09743
NCU08681	Pa_3_3097	not found in databases
NCU08522	Pa_7_4160	putative protein of unknown function	1	1.66	0.00058	-1.00634
NCU09657	Pa_3_310	GYF domain-containing protein	0	-1.04	0.31684
NCU04811	Pa_4_9465	not found in databases
NCU05200	Pa_1_24240	Pro-apoptotic serine protease nma-111	0	1.02	0.47572
NCU02813	Pa_6_6000	26S proteasome regulatory subunit RPN9	0	1.03	0.60032
NCU04184	Pa_6_5220	vesicular-fusion protein SEC18	0	-1.14	0.06106
NCU09869	Pa_4_6220	exocyst protein	1	-1.84	0	-1.00259
NCU07697	Pa_6_2730	isocitrate dehydrogenase	0	1.04	0.37976
NCU03306	Pa_1_7020	tubulin-specific chaperone Rbl2	0	1.22	0.01401
NCU02427	Pa_5_5480	nucleolar essential protein 1	0	-1.05	0.66086
6nc110_200	Pa_4_4260	hexose transporter protein	0	1.05	0.66552
NCU03841		not found in databases
NCU04437	Pa_6_10060	putative protein of unknown function	0	1.34	0.3385
NCU04709		no ortholog detected in P. anserina
NCU02539	Pa_1_8690	DNA replication licensing factor mcm4	0	1.31	0.00043
NCU00179		no ortholog detected in P. anserina
NCU08837		no ortholog detected in P. anserina
NCU06658	Pa_2_2130	SET domain-containing protein	0	1.02	0.87527
NCU01891	Pa_1_21210	putative protein of unknown function	0	-1.16	0.66454
7nc610_100		not found in databases
NCU01865	Pa_1_22140	F-box domain-containing protein	0	1	0.9896
NCU04048	Pa_4_7680	putative protein of unknown function	0	1.02	0.68245
NCU09158		no ortholog detected in P. anserina
NCU06510		not found in databases
NCU07324	Pa_1_18418	conidiation-13	0	-1.1	0.87585
NCU06937	Pa_6_10945	putative protein of unknown function	0	1.22	0.3956
NCU05154	Pa_5_7760	calcium transporting ATPase	0	-1.33	0.20246
NCU00036		no ortholog detected in P. anserina
NCU04265		no ortholog detected in P. anserina
NCU07050		no ortholog detected in P. anserina
NCU06377		no ortholog detected in P. anserina
NCU00687	Pa_1_18860	putative protein of unknown function	0	-1.05	0.58929
NCU02879	Pa_1_1330	ZIP zinc transporter	0	-1.13	0.02651
NCU06641		no ortholog detected in P. anserina
NCU02927	Pa_4_3820	FAD binding domain-containing protein	1	1.65	3e-05	1.05466
NCU10916		no ortholog detected in P. anserina
NCU03295	Pa_1_6962	no found in databases
NCU06940	Pa_5_12980	putative protein of unknown function	1	-1.69	0	1.07057
NCU03352	Pa_3_6340	transcriptional regulator	0	-1.02	0.63231
NCU07306		no ortholog detected in P. anserina
NCU02226	Pa_5_4460	methylthioribose-1-phosphate isomerase	0	1.41	0
NCU08182		no ortholog detected in P. anserina
NCU03919		not found in databases
3nc116_040		no ortholog detected in P. anserina
NCU09559	Pa_5_1750	clock-controlled gene-9 protein	0	-1.4	0
NCU02046	Pa_1_10080	putative protein of unknown function	0	-1.06	0.68901
1nc200_040		no ortholog detected in P. anserina
NCU01733		not found in databases
NCU07777		no ortholog detected in P. anserina
NCU03043	Pa_1_17760	C2H2 finger domain-containing protein FlbC	0	-1.45	1e-05
NCU07006		not found in databases
NCU03930	Pa_3_6620	C6 transcription factor	0	1.54	0.21915
NCU08489	Pa_4_8650	manganese transporter SMF1	0	-1.15	0.10975
NCU06389	Pa_6_5820	DUF625 domain-containing protein	0	1.32	0.32936
NCU03563	Pa_6_4560	actin-related protein RO7	0	-1.02	0.78774
NCU02316	Pa_5_9840	putative protein of unknown function	0	1.03	0.48342
NCU10896		no ortholog detected in P. anserina
NCU09893		not found in databases
NCU09785	Pa_4_4850	putative protein of unknown function	1	-1.52	5e-05	1.15242
NCU07855	Pa_6_8290	putative protein of unknown function	0	1.03	0.79244
NCU07361	Pa_1_18170	COP9 signalosome complex subunit 4	0	-1.07	0.35903
NCU05794		no ortholog detected in P. anserina
NCU05887	Pa_5_2270	oxidoreductase	0	1.16	0.31015
NCU02591	Pa_1_11270	glycerol uptake protein 1	1	-1.75	2e-05	1.16602
NCU05266	Pa_3_4120	KH domain-containing protein	0	-1.16	0.28666
NCU03025		not found in databases
1nc200_120		no ortholog detected in P. anserina
NCU01652	Pa_3_6930	O-acetylhomoserine (thiol)-lyase	0	-1.22	0.02912
NCU01071		no ortholog detected in P. anserina
NCU04322	Pa_2_12890	MFS transporter	0	1.42	0
NCU03604	Pa_2_1160	putative protein of unknown function	0	1.37	0.00011
NCU04718	Pa_4_6470	DUF1752 family protein	0	1.15	0.29107
NCU02725	Pa_1_13730	UPF0171 domain protein	0	1.03	0.68606
NCU09287	Pa_5_4520	sugar transporter	0	-1.32	5e-05
NCU03042	Pa_1_17770	splicing factor 3B subunit 1	0	-1.1	0.01333
NCU02926	Pa_5_11050	FAD-dependent oxidase	1	4.85	0	1.4978
NCU09075		no ortholog detected in P. anserina
NCU00776	Pa_1_5740	tyrosinase	1	2.47	0.00042	1.53628
NCU09691	Pa_0_800	putative protein of unknown function	1	1.65	2e-05	1.60082
NCU06318	Pa_6_5030	RNA helicase	0	-1.21	0.14925
NCU02155	Pa_0_300	2-dehydropantoate 2-reductase	0	1.1	0.1013
NCU02875		no ortholog detected in P. anserina
NCU09055	Pa_2_8145	putative protein of unknown function	0	-1.23	0.19293
NCU03203	Pa_1_9050	putative protein of unknown function	0	-1.23	0.50497
NCU04962		no ortholog detected in P. anserina
NCU09948		no ortholog detected in P. anserina
		Total of ortholog pairs	57
